# Supplementary material
Source: PubMed Central journal article supplement (PMC10119368)

Neurotherapeutics

The Journal of the American Society for Experimental

Neurotherapeutics

Editor-in-Chief: Mouradian, M.

ISSN: 1933-7213 (print version)

ISSN: 1878-7479 (electronic version)

Journal no. 13311

Grenoble, 2022 June 09

I, Chantal DELON-MARTIN, co-author of the article "Better fields or currents? A head-to-head comparison of Transcranial Magnetic (rTMS) versus Direct Current Stimulation (tDCS) for Neuropathic Pain", certify that I have no actual or potential conflict of interest in relation to this article.

Chantal Delon-Martin



Supplement: 13311_2022_1303_MOESM1_ESM.pdf [file 13311_2022_1303_MOESM1_ESM.pdf]
